# Supplementary material
Source: Research Square preprint supplement (doi:10.21203/rs.3.rs-10082755/v1)
Supplement: Supplementary file 1 [file 135a0604a97b60cb3fe7f773.docx]

Table 1: Demographic distributions and distributions of surgical procedures/interventions

| **Characteristic** | **Frequency (n)** | **Percentage (%)** |
| --- | --- | --- |
| Total Participants | 203 | 100% |
| Gender |  |  |
| Male | 154 | 75.9% |
| Female | 49 | 24.1% |
| Age (Years) |  |  |
| Mean (SD) | 7.28 (3.28) | - |
| Weight (kg) |  |  |
| Mean (SD) | 20.88 (6.53) | - |
| Type of Surgery |  |  |
| Circumcision | 82 | 40.4% |
| Inguinal Hernia | 36 | 17.7% |
| Undescended Testis | 27 | 13.3% |
| Ventilation Tube | 25 | 12.3% |
| Endoscopy | 11 | 5.4% |
| Others (Probing, Hernia etc.) | 22 | 10.9% |
