# Supplementary material
Source: Research Square preprint supplement (doi:10.21203/rs.3.rs-10082755/v1)
Supplement: Supplementary file 2 [file 1c663725ab27ab0007866a08.docx]

Table 2: Parent Satisfactions

| **Parent Satisfaction Questions** | **n (%)** | **Median** | **Interquartile Range (Q1–Q3)** |
| --- | --- | --- | --- |
| Preoperative dialogue with anesthesiologist | 203 (100%) | 10 | 8–10 |
| Environmental comfort | 203 (100%) | 10 | 9–10 |
| General nurse assistance | 203 (100%) | 10 | 10–10 |
| Postoperative anesthesiologist observation time | 203 (100%) | 10 | 9–10 |
| Postoperative nurse observation time | 203 (100%) | 10 | 9–10 |
| General opinion | 203 (100%) | 10 | 9–10 |
