# Supplementary material
Source: Research Square preprint supplement (doi:10.21203/rs.3.rs-10082755/v1)
Supplement: Supplementary file 3 [file 21a2e49e01fb5f4b9c46034a.docx]

Table 3: Distribution of fear levels according to other characteristics Chi-square analysis identified child fear (Q1) with staff friendliness (Q3, p=0.007), anesthesia induction difficulty (Q4a, p=0.005), and postoperative pain (Q5a, p<0.001).

| **Comparison** | **χ² Value** | **p-value** | **Fisher’s p** | **Spearman r** | **p-value** | **Significance** |
| --- | --- | --- | --- | --- | --- | --- |
| Q1 Fear vs Q5a Postoperative Pain | 12.93 | <0.001 | <0.001 | 0.42 | <0.001 | Highly Significant |
| Q1 Fear vs Q4a Anesthesia Induction Difficulty | 8.02 | 0.005 | 0.004 | 0.35 | 0.002 | Significant |
| Q1 Fear vs Q3 Staff Friendliness | 7.26 | 0.007 | 0.004 | - | - | Significant |
| Q1 Fear vs Q2 Calmness | 0.1 | 0.161 | 0.125 | - | - | Not Significant |
| Q1 Fear vs Q5b Nausea | 1.58 | 0.209 | 0.17 | - | - | Not Significant |
| Q1 Fear vs Other Minor Symptoms (Q5c,d,e) | <0.67 | >0.498 | >0.498 | - | - | Not Significant |
