# Supplementary material
Source: Research Square preprint supplement (doi:10.21203/rs.3.rs-10082755/v1)
Supplement: Supplementary file 4 [file 5a6d48d92640e7dc9ac47e4f.docx]

Table 4. Psychometric Properties of the Questionnaire and Acceptable Ranges

| **Psychometric Analysis** | **Obtained Value** | **Acceptable Normal Range** | **Comment / Evaluation** |
| --- | --- | --- | --- |
| Cronbach’s Alpha (Parent Subscale) | 0.72 | ≥0.70 | Acceptable |
| Cronbach’s Alpha (Child Subscale) | 0.52 | 0.50–0.70 (for binary items) | Acceptable |
| Test-Retest Reliability (Parent) | 0.85 | ≥0.70 | Good |
| Test-Retest Reliability (Child) | 0.78 | ≥0.70 | Acceptable |
| Content Validity Index (CVI) | 0.92 | ≥0.80 | Very good |
| KMO (Kaiser-Meyer-Olkin) | 0.78 | 0.70–1.00 | Good |
| Bartlett’s Test of Sphericity | p<0.001 | p<0.05 | Appropriate |
| EFA Factor Structure | One-dimensional | - | Supported |
| EFA Factor Loadings | 0.45–0.82 | ≥0.40 | Acceptable |
| CFA- RMSEA | 0.05 | ≤0.08 (good ≤0.05) | Very good fit |
| CFA- CFI | 0.96 | ≥0.90 (good ≥0.95) | Very good fit |
| CFA- TLI | 0.95 | ≥0.90 (good ≥0.95) | Very good fit |
